# Supplementary material for: Interpenetrating covalent adaptable networks with enhanced mechanical properties and facile reprocessability and recyclability
Source: Royal Society of Chemistry journal article supplement (doi:10.1039/d1py00623a), 2021-01-01
Supplement: d1py00623a1.pdf [file d1py00623a1.pdf]

Electronic Supporting Information (ESI) for

# Interpenetrating Covalent Adaptable Networks with Enhanced Mechanical Properties and Facile Reprocessability and Recyclability

Yufeng Lei <sup>a</sup>, Anqiang Zhang <sup>a,\*</sup>, Yaling Lin <sup>b,\*</sup>

*a.* Department of Polymer Materials and Engineering, School of Materials Science and Engineering, South China University of Technology, 381 Wushan Rd., Guangzhou 510641, China.

*b.* College of Materials and Energy, South China Agricultural University, 483 Wushan Rd., Guangzhou 510642, China.

\*. Corresponding Author: Prof. Anqiang Zhang, Email: aqzhang@scut.edu.cn; Prof. Yaling Lin, Email: linyaling@scau.edu.cn

## PART S1. Synthesis of Covalent Adaptable Single Network

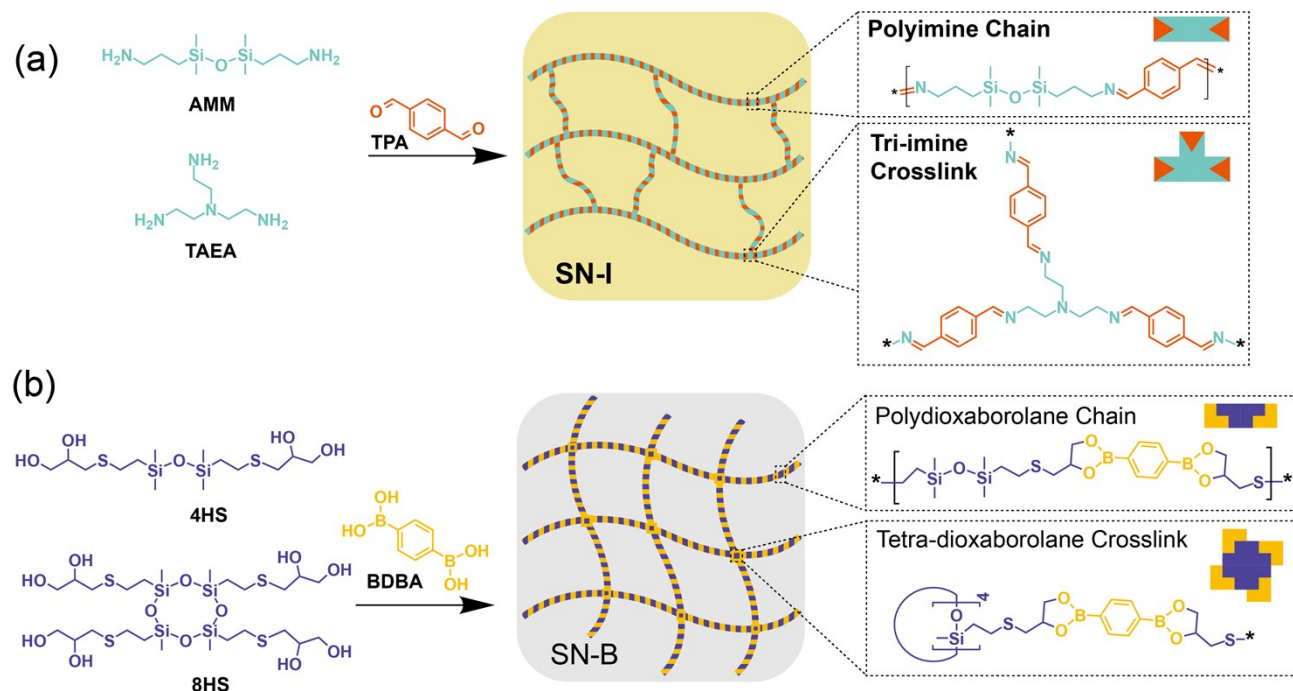

**Scheme S1.** Synthesis of covalent adaptable single network: (a) imine-based single network (SN-I), (b) boronic-acid based single network (SN-B).

Imine-based single network (SN-I): As is illustrated in **Scheme S1a**, SN-I was synthesized *via* imine condensation of small-molecular amines and aldehydes according to our previous report<sup>1</sup>. Briefly, TAEA (0.97 g, 6.7 mmol), AMM (2.48 g, 10 mmol) and TPA (2.68 g, 20 mmol) were dissolved in THF separately and then mixed. After 1 h stirring at ambient conditions, the solvents were evaporated at 80 °C for 6 h. The resultant orange transparent film was further heated in a vacuum oven at 80 °C for 12 h for the complete curing of polyimine network.

Boronic-ester-based single network (SN-B): As is illustrated in **Scheme S1b**, SN-B was synthesized *via* esterification of small-molecular diols and boronic-acids according to our previous report<sup>2</sup>. Briefly, **4HS** (4.02 g, 10 mmol), **8HS** (3.88 g, 5 mmol) and BDDBA (2.68 g, 20 mmol) were dissolved in THF separately and then mixed. After 1 h stirring at ambient conditions, the solvents were evaporated at 80 °C for 6 h. The resultant colorless transparent

film was further heated in a vacuum oven at 80 °C for 12 h for the complete curing of polydioxaborolane network.

## References

- [1]. Lei, Y.; Shan, S.; Lin, Y.; Zhang, A. Network Reconfiguration and Unusual Stress Intensification of a Dynamic Reversible Polyimine Elastomer. *Polymer* **2020**, *186*, 122031.
- [2]. Lei, Y.; Zhang, A.; Lin, Y. Reprocessability of Dynamic Polydioxaborolane Networks Activated by Heat, Moisture and Mechanical Force. *Polymer* **2020**, *209*, 123037.

## PART S2. Supporting Figures

(a) IPCAN-25

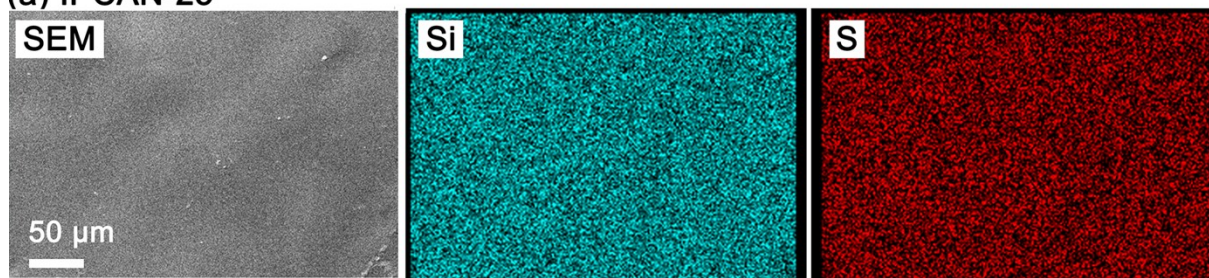

(b) IPCAN-50

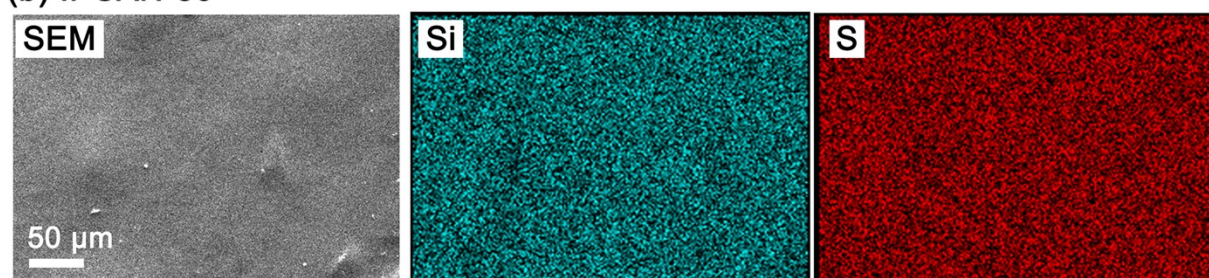

(c) IPCAN-75

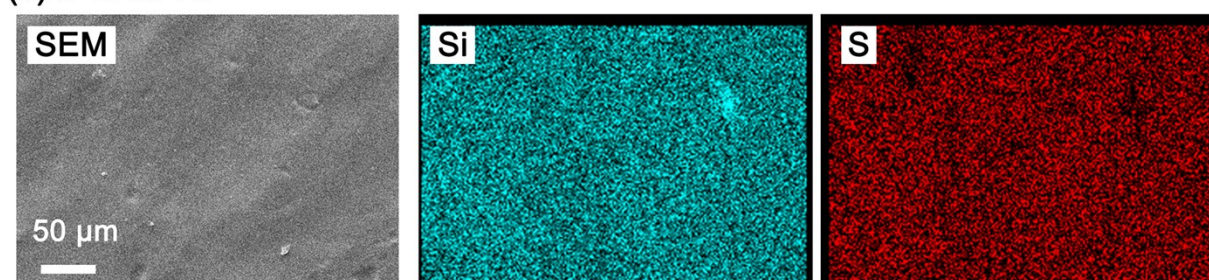

(d) DN-50-c

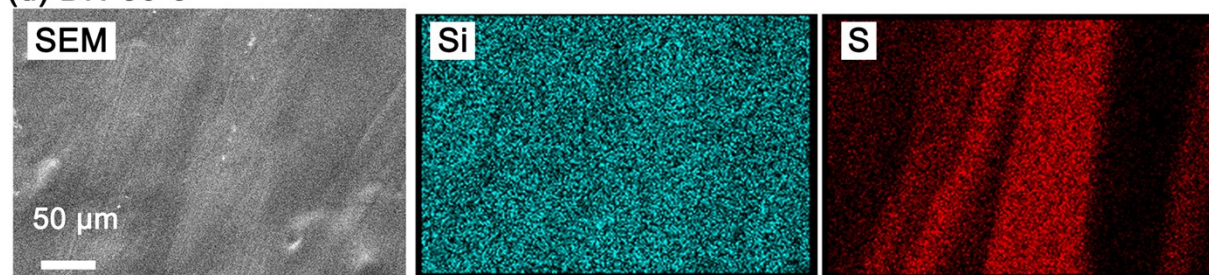

**Fig. S1.** SEM photos and elemental mapping of IPCANs and DN-50-c.

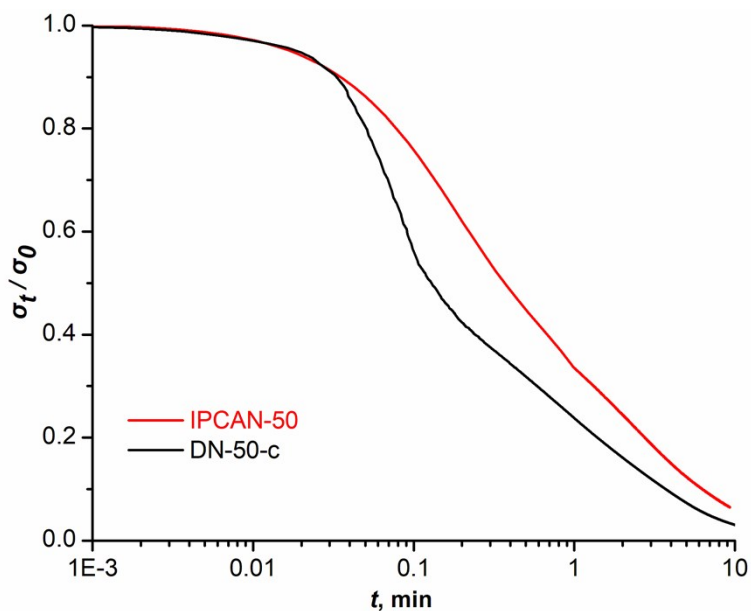

**Fig. S2.** Tensile stress relaxation curves of IPCAN-50 and DN-50-c.

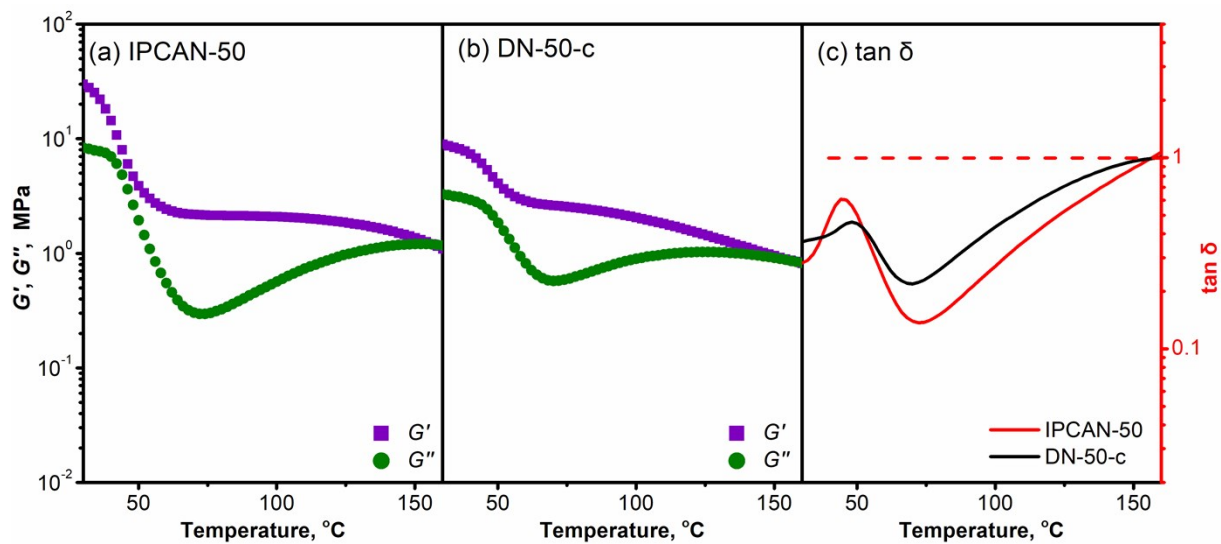

**Fig. S3.** Temperature dependency of storage modulus ( $G'$ ), loss modulus ( $G''$ ) for (a) IPCAN-50, (b) DN-50-c and (c) plot of  $\tan \delta$  against temperature for IPCAN-50 and DN-50-c.
